# Supplementary material
Source: ML conference proceedings conference paper supplement (https://proceedings.neurips.cc/paper_files/paper/2017/hash/fa7cdfad1a5aaf8370ebeda47a1ff1c3-Abstract.html)
Supplement: Supplementary file [file fa7cdfad1a5aaf8370ebeda47a1ff1c3-Supplemental.zip]

## A Proof of Theorem 3.1

*Proof.* In order to prove that the new dictionary is still optimal, we only need to show that new dictionary is still primal and dual feasible:  $x_{\mathcal{B}^*}^* + \lambda^* \bar{x}_{\mathcal{B}} \geq \mathbf{0}$  and  $z_{\mathcal{N}^*}^* + \lambda^* \bar{z}_{\mathcal{N}^*} \geq \mathbf{0}$ .

Case I. When calculating  $\lambda^*$  given by (3.10), if the constraint corresponds to an index  $i \in \mathcal{B}$ , then  $z_{\mathcal{N}^*}^* + \lambda^* \bar{z}_{\mathcal{N}^*} \geq \mathbf{0}$  is guaranteed by the way of choosing entering variable. It remains to show the primal solution is not changed:  $x_{\mathcal{B}}^* + \lambda^* \bar{x}_{\mathcal{B}} = x_{\mathcal{B}^*}^* + \lambda^* \bar{x}_{\mathcal{B}^*}$ .

We observe that  $A_{\mathcal{B}^*}$  is obtained by changing one column of  $A_{\mathcal{B}}$  to another column vector from  $A_{\mathcal{N}}$ , and we assume the difference of these two vectors are  $u$ . Without loss of generality, we assume that the  $k$ -th column of  $A_{\mathcal{B}}$  is replaced, now we have  $A_{\mathcal{B}^*} = A_{\mathcal{B}} + ue_k^\top$ . Sherman-Morrison formula says that

$$A_{\mathcal{B}} A_{\mathcal{B}^*}^{-1} = I - \frac{ue_k^\top A_{\mathcal{B}}^{-1}}{1 + e_k^\top A_{\mathcal{B}}^{-1} u} = I - \theta ue_k^\top A_{\mathcal{B}}^{-1}, \quad (\text{A.1})$$

where  $\theta = \frac{1}{1 + e_k^\top A_{\mathcal{B}}^{-1} u}$ . Now consider the following term:

$$\begin{aligned} & A_{\mathcal{B}}[x_{\mathcal{B}}^* - x_{\mathcal{B}^*}^* + \lambda^*(\bar{x}_{\mathcal{B}} - \bar{x}_{\mathcal{B}^*})] \\ &= A_{\mathcal{B}}(A_{\mathcal{B}}^{-1} - A_{\mathcal{B}^*}^{-1})b + \lambda^* A_{\mathcal{B}}(A_{\mathcal{B}}^{-1} - A_{\mathcal{B}^*}^{-1})\bar{b} \\ &= b - A_{\mathcal{B}} A_{\mathcal{B}^*}^{-1} b + \lambda^*(\bar{b} - A_{\mathcal{B}} A_{\mathcal{B}^*}^{-1} \bar{b}) \\ &= (\theta ue_k^\top A_{\mathcal{B}}^{-1})b + \lambda^*(\theta ue_k^\top A_{\mathcal{B}}^{-1})\bar{b} \\ &= \theta(ue_k^\top A_{\mathcal{B}}^{-1} b + \lambda^* ue_k^\top A_{\mathcal{B}}^{-1} \bar{b}). \end{aligned} \quad (\text{A.2})$$

Recall in this case, we have

$$\lambda^* = \max_{i \in \mathcal{B}, \bar{x}_{\mathcal{B}^*} > 0} -\frac{x_{\mathcal{B}^*}^*}{\bar{x}_{\mathcal{B}^*}} = -\frac{e_k^\top A_{\mathcal{B}}^{-1} b}{e_k^\top A_{\mathcal{B}}^{-1} \bar{b}}. \quad (\text{A.3})$$

Substitute the definition of  $\lambda^*$  from (A.3) into (A.2), we notice that the expression in (A.2) is  $\mathbf{0}$ . Since  $A_{\mathcal{B}}$  is invertible, we have  $x_{\mathcal{B}}^* + \lambda^* \bar{x}_{\mathcal{B}} = x_{\mathcal{B}^*}^* + \lambda^* \bar{x}_{\mathcal{B}^*}$ , and thus the new dictionary is still optimal at  $\lambda^*$ .

Case II. When calculating  $\lambda^*$  given by (3.10), if, on the other hand, the constraint corresponds to an index  $j \in \mathcal{N}$ , then  $x_{\mathcal{B}^*}^* + \lambda^* \bar{x}_{\mathcal{B}} \geq \mathbf{0}$  is guaranteed by the way we choose leaving variable. It remains to show that it is still dual feasible.

Again, we observe that  $A_{\mathcal{B}^*}$  is obtained by changing one column of  $A_{\mathcal{B}}$  (say,  $a_i$ ) to another column vector from  $A_{\mathcal{N}}$  (say,  $a_j$ ), and we denote  $u = a_j - a_i$  as the difference of these two vectors. Without loss of generality, we assume the replacement occurs at the  $k$ -th column of  $A_{\mathcal{B}}$ . Sherman-Morrison formula gives

$$A_{\mathcal{B}^*}^{-1} A_{\mathcal{B}} = I - \frac{A_{\mathcal{B}}^{-1} u e_k^\top}{1 + e_k^\top A_{\mathcal{B}}^{-1} u} = I - \frac{p e_k^\top}{1 + e_k^\top p} = \begin{pmatrix} 1 & & -\frac{p_1}{1+p_k} & & \\ & \ddots & \vdots & & \\ & & \frac{1}{1+p_k} & & \\ & & \vdots & \ddots & \\ & & -\frac{p_m}{1+p_k} & & 1 \end{pmatrix}, \quad (\text{A.4})$$

where  $p = A_{\mathcal{B}}^{-1} u$ , and  $p_l$  denotes the  $l$ -th entry of  $p$ . Observe that in (A.4), only the  $k$ -th column is different from the identity matrix.

Dual feasible requires that  $z_{\mathcal{N}}^* = (A_{\mathcal{B}}^{-1} A_{\mathcal{N}})^\top c_{\mathcal{B}} - c_{\mathcal{N}} \geq \mathbf{0}$ . Since  $(A_{\mathcal{B}}^{-1} A_{\mathcal{B}})^\top c_{\mathcal{B}} - c_{\mathcal{B}} = \mathbf{0}$ , we slightly change the dual feasible condition to:  $(A_{\mathcal{B}}^{-1} A)^\top c_{\mathcal{B}} - c \geq \mathbf{0}$ . In the parametric linear programming sense,  $c \leftarrow c + \lambda \bar{c}$  and  $c_{\mathcal{B}} \leftarrow c_{\mathcal{B}} + \lambda \bar{c}_{\mathcal{B}}$ . We only need to show that  $(A_{\mathcal{B}}^{-1} A)^\top (c_{\mathcal{B}} + \lambda^* \bar{c}_{\mathcal{B}}) - (c + \lambda^* \bar{c}) = (A_{\mathcal{B}^*}^{-1} A)^\top (c_{\mathcal{B}^*} + \lambda^* \bar{c}_{\mathcal{B}^*}) - (c + \lambda^* \bar{c})$ . Consider the following term:

$$\begin{aligned} & (A_{\mathcal{B}^*}^{-1} A)^\top c_{\mathcal{B}^*} - c + \lambda^* [(A_{\mathcal{B}^*}^{-1} A)^\top \bar{c}_{\mathcal{B}^*} - \bar{c}] - \{(A_{\mathcal{B}}^{-1} A)^\top c_{\mathcal{B}} - c + \lambda^* [(A_{\mathcal{B}}^{-1} A)^\top \bar{c}_{\mathcal{B}} - \bar{c}]\} \\ &= A^\top (A_{\mathcal{B}^*}^{-1})^\top (c_{\mathcal{B}^*} + \lambda^* \bar{c}_{\mathcal{B}^*}) - A^\top (A_{\mathcal{B}}^{-1})^\top (c_{\mathcal{B}} + \lambda^* \bar{c}_{\mathcal{B}}) \\ &= A^\top (A_{\mathcal{B}}^{-1})^\top (A_{\mathcal{B}^*}^{-1} A_{\mathcal{B}})^\top (c_{\mathcal{B}^*} + \lambda^* \bar{c}_{\mathcal{B}^*}) - A^\top (A_{\mathcal{B}}^{-1})^\top (c_{\mathcal{B}} + \lambda^* \bar{c}_{\mathcal{B}}) \\ &= -\alpha A^\top (A_{\mathcal{B}^*}^{-1})^\top e_k, \end{aligned} \quad (\text{A.5})$$

where  $\alpha$  is a constant. According to (A.4), we have

$$\begin{aligned}
\alpha &= \sum_{l \in \mathcal{B}^* \setminus j} \frac{(c_l + \lambda^* \bar{c}_l) p_l}{1 + p_k} - \frac{c_j + \lambda^* \bar{c}_j}{1 + p_k} + c_i + \lambda^* \bar{c}_i \\
&= \sum_{l \in \mathcal{B}} \frac{(c_l + \lambda^* \bar{c}_l) p_l}{1 + p_k} + \frac{c_i + \lambda^* \bar{c}_i - c_j - \lambda^* \bar{c}_j}{1 + p_k} \\
&= \frac{(c_{\mathcal{B}} + \lambda^* \bar{c}_{\mathcal{B}})^\top A_{\mathcal{B}}^{-1} u + c_i + \lambda^* \bar{c}_i - c_j - \lambda^* \bar{c}_j}{1 + p_k} \\
&= \frac{(c_{\mathcal{B}} + \lambda^* \bar{c}_{\mathcal{B}})^\top A_{\mathcal{B}}^{-1} (a_j - a_i) + c_i + \lambda^* \bar{c}_i - c_j - \lambda^* \bar{c}_j}{1 + p_k} \\
&= \frac{(c_{\mathcal{B}} + \lambda^* \bar{c}_{\mathcal{B}})^\top (A_{\mathcal{B}}^{-1} a_j - e_k) + c_i + \lambda^* \bar{c}_i - c_j - \lambda^* \bar{c}_j}{1 + p_k} \quad \text{since } A_{\mathcal{B}}^{-1} a_i = e_k \\
&= \frac{(c_{\mathcal{B}} + \lambda^* \bar{c}_{\mathcal{B}})^\top (A_{\mathcal{B}}^{-1} a_j) - c_j - \lambda^* \bar{c}_j}{1 + p_k} \\
&= \frac{(c_{\mathcal{B}}^\top A_{\mathcal{B}}^{-1} a_j - c_j) + \lambda^* (\bar{c}_{\mathcal{B}}^\top A_{\mathcal{B}}^{-1} a_j - \bar{c}_j)}{1 + p_k},
\end{aligned} \tag{A.6}$$

where  $c_i$  and  $c_j$  are the entries in  $c$ , with indices corresponding to  $a_i$  and  $a_j$ , and  $\bar{c}_i$  and  $\bar{c}_j$  are the entries in  $\bar{c}$  and defined similarly.

Recall in this case

$$\lambda^* = \max_{j \in \mathcal{N}, \bar{z}_{\mathcal{N}_j} > 0} - \frac{z_{\mathcal{N}_j}^*}{\bar{z}_{\mathcal{N}_j}} = - \frac{(A_{\mathcal{B}}^{-1} a_j)^\top c_{\mathcal{B}} - c_j}{(A_{\mathcal{B}}^{-1} a_j)^\top \bar{c}_{\mathcal{B}} - \bar{c}_j}. \tag{A.7}$$

Substitute the definition of  $\lambda^*$  from (A.7) into (A.6), we observe that  $\alpha = 0$  and thus the dual feasible is guaranteed in the new dictionary. This proves Theorem 3.1.  $\square$

## B Proof of Theorem 3.5

For notational simplicity, we omit the superscript  $\lambda'$  in  $\hat{\mu}$ . Before we proceed with the statistical properties of the Dantzig selector, we first introduce the following lemmas.

**Lemma B.1** (Bühlmann and Van De Geer (2011)). Suppose that Assumptions 3.2 and 3.4 hold. Define  $\hat{\Delta} = \hat{\theta} - \theta^*$ . We have

$$\|\hat{\Delta}_{\bar{\mathcal{S}}}\|_1 \leq \|\hat{\Delta}_{\mathcal{S}}\|_1. \tag{B.1}$$

Moreover, we have

$$\min_{\|\Delta_{\bar{\mathcal{S}}}\|_1 \leq \|\Delta_{\mathcal{S}}\|_1} \frac{\Delta^\top \nabla^2 \mathcal{L}(\theta) \Delta}{\|\Delta\|_2^2} \geq \frac{\rho_-(s^* + 2\tilde{s})}{4} \tag{B.2}$$

The proof of Lemma B.1 is provided in Bühlmann and Van De Geer (2011), and therefore is omitted. Note that (B.1) in Lemma B.1 implies that  $\hat{\theta}$  lies in a restricted cone-shape set, and (B.2) implies that (B.1) combined with Assumption 3.4 implies the restricted eigenvalue condition. The next lemma presents the statistical rates of convergence of the Dantzig selector.

**Lemma B.2** (Candes and Tao (2007)). Suppose that Assumptions 3.2 and 3.4 hold. We have

$$\|\Delta\|_2 = \frac{C_1 \sqrt{s^*} \lambda}{\rho_-(s^* + 2\tilde{s})} \quad \text{and} \quad \|\Delta\|_1 = \frac{C_2 s^* \lambda}{\rho_-(s^* + 2\tilde{s})} \tag{B.3}$$

The proof of Lemma B.2 is provided in Candes and Tao (2007), and therefore is omitted. Based on Lemmas B.1 and B.2, we can further characterize the statistical properties of  $\nabla \mathcal{L}(\hat{\theta})$  in the following lemma.

**Lemma B.3.** Suppose that Assumptions 3.2 and 3.4 hold. We have

$$\left| \left\{ j \mid |\nabla_j \mathcal{L}(\hat{\theta})| \geq \frac{3\lambda}{4}, j \in \bar{\mathcal{S}} \right\} \right| \leq \tilde{s} \tag{B.4}$$

*Proof.* By Assumption 3.2, we have  $\lambda \geq 8\|\nabla\mathcal{L}(\theta^*)\|_\infty$ , which further implies

$$|\{j \mid |\nabla_j\mathcal{L}(\theta^*)| \geq \lambda/8, j \in \bar{\mathcal{S}}\}| = 0. \quad (\text{B.5})$$

We then consider an arbitrary set  $\mathcal{S}'$  such that

$$\mathcal{S}' = \{j \mid |\nabla_j\mathcal{L}(\hat{\theta}) - \nabla_j\mathcal{L}(\theta^*)| \geq 5\lambda/8, j \in \bar{\mathcal{S}}\}.$$

Let  $s' = |\mathcal{S}'|$ . Then there exists  $v$  such that

$$\|v\|_\infty = 1, \quad \|v\|_0 \leq s', \quad \text{and} \quad 5s'\lambda/8 \leq v^\top (\nabla\mathcal{L}(\hat{\theta}) - \nabla\mathcal{L}(\theta^*)).$$

Since  $\mathcal{L}(\hat{\theta})$  is twice differentiable, then by the mean value theorem, there exists some  $z_1 \in [0, 1]$  such that

$$\ddot{\theta} = z_1\theta + (1 - z_1)\theta^* \quad \text{and} \quad \nabla\mathcal{L}(\hat{\theta}) - \nabla\mathcal{L}(\theta^*) = \nabla^2\mathcal{L}(\ddot{\theta})\Delta.$$

Then we have

$$\frac{5s'\lambda}{8} \leq v^\top \nabla^2\mathcal{L}(\ddot{\theta})\Delta \leq \sqrt{v^\top \nabla^2\mathcal{L}(\ddot{\theta})v} \sqrt{\Delta^\top \nabla^2\mathcal{L}(\ddot{\theta})\Delta}.$$

Since we have  $\|v\|_0 \leq s'$ , then we obtain

$$\begin{aligned} \frac{3s'\lambda}{4} &\leq \sqrt{\rho_+(s')} \sqrt{s'} \sqrt{\Delta^\top (\nabla\mathcal{L}(\hat{\theta}) - \nabla\mathcal{L}(\theta^*))} \\ &\leq \sqrt{\rho_+(s')} \sqrt{s'} \sqrt{\|\Delta\|_1 \cdot \|\nabla\mathcal{L}(\hat{\theta}) - \nabla\mathcal{L}(\theta^*)\|_\infty} \\ &\leq \sqrt{\rho_+(s')} \sqrt{s'} \sqrt{\|\Delta\|_1 (\|\nabla\mathcal{L}(\hat{\theta})\|_\infty + \|\nabla\mathcal{L}(\theta^*)\|_\infty)} \\ &\leq \sqrt{\rho_+(s')} \sqrt{s'} \sqrt{\|\Delta\|_1 (\|\nabla\mathcal{L}(\hat{\theta}) - \lambda\xi\|_\infty + \lambda\|\tilde{\xi}\|_\infty + \|\nabla\mathcal{L}(\theta^*)\|_\infty)} \\ &\leq \sqrt{\rho_+(s')} \sqrt{s'} \sqrt{\frac{115s^*\lambda^2}{12\rho_-(s^* + \tilde{s})}}. \end{aligned}$$

By simple manipulation, we have

$$\frac{5\sqrt{s'}}{8} \leq \sqrt{\rho_+(s')} \sqrt{\frac{115s^*}{12\rho_-(s^* + \tilde{s})}},$$

which implies

$$s' \leq \frac{184\rho_+(s')}{15\rho_-(s^* + \tilde{s})} \cdot s^*.$$

Since  $s' = |\mathcal{S}'|$  attains the maximum value such that  $s' \leq \tilde{s}$  for arbitrary defined subset  $\mathcal{S}'$ , we obtain  $s' \leq \tilde{s}$ . Then by simple manipulation, we have

$$|\{j \mid |\nabla_j\mathcal{L}(\hat{\theta}) - \nabla_j\mathcal{L}(\theta^*)| \geq 5\lambda/8, j \in \bar{\mathcal{S}}\}| \leq 13\kappa s^* < \tilde{s}. \quad (\text{B.6})$$

Thus, (B.5) and (B.6) imply

$$|\{j \mid |\nabla_j\mathcal{L}(\hat{\theta})| \geq 3\lambda/4, j \in \bar{\mathcal{S}}\}| \leq \tilde{s}.$$

□

By the complementary slackness, we have  $\hat{\mu}_j(\nabla_j\mathcal{L}(\hat{\theta}) - \lambda) = 0$  and  $\hat{\gamma}_j(-\nabla_j\mathcal{L}(\hat{\theta}) - \lambda) = 0$ . By (B.3), we know

$$|\{j \mid \hat{\mu}_j \neq 0 \text{ or } \hat{\gamma}_j \neq 0, j \in \bar{\mathcal{S}}\}| \leq \tilde{s}. \quad (\text{B.7})$$

Thus, we show that the optimal dual variables are sparse. The cardinality is at most  $2s^* + \tilde{s}$ .

To control the sparsity of the primal variables, we directly use the following lemma.

**Lemma B.4** (Gai et al. (2013)). Suppose that Assumptions 3.2 and 3.4 hold. Given the design matrix satisfying

$$\|X_{\bar{\mathcal{S}}}^\top X_{\mathcal{S}}(X_{\mathcal{S}}^\top X_{\mathcal{S}})^{-1}\|_\infty \leq 1 - \zeta,$$

where  $\zeta > 0$  is a generic constant, we have  $\hat{\theta}_j = 0$  for any  $j \in \bar{\mathcal{S}}$ .

The proof of Lemma (B.4) is provided in Gai et al. (2013). Lemma B.4 guarantees that  $\hat{\theta}$  does not select any irrelevant coordinates. Thus, we complete the proof.
